# Supplementary material
Source: Springer Nature journal article supplement (https://www.springermedizin.de/resource/supplementary/12876_2012_805_MOESM3_ESM.pdf/9437548)
Supplement: MOESM3 [file 9437548]

### Additional file 3: Case Report Form – New Case – ER

|                                  |                                                                                  |  |
|----------------------------------|----------------------------------------------------------------------------------|--|
| <b>ER Consultation</b>           | Date and time __/__/____, __:__ (dd/mm/yyyy, hh:mm)                              |  |
| <b>Doctor's Last Name</b>        | _____                                                                            |  |
| <b>Demographics</b>              | Date of birth __/__/____ (dd/mm/yyyy)                                            |  |
| Patient Hospital Number:         | _____                                                                            |  |
| Gender                           | Male <input type="checkbox"/> , Female <input type="checkbox"/>                  |  |
| Ethnicity                        | Caucasian <input type="checkbox"/>                                               |  |
|                                  | Asian <input type="checkbox"/>                                                   |  |
|                                  | African <input type="checkbox"/>                                                 |  |
|                                  | Other/mix _____ <input type="checkbox"/>                                         |  |
| Comorbidities                    | Cardiovascular <input type="checkbox"/>                                          |  |
|                                  | Respiratory <input type="checkbox"/>                                             |  |
|                                  | Neurological <input type="checkbox"/>                                            |  |
|                                  | Diabetes Mellitus <input type="checkbox"/>                                       |  |
|                                  | Rheumatological <input type="checkbox"/>                                         |  |
|                                  | Other: _____ <input type="checkbox"/>                                            |  |
| <b>Suspicion of appendicitis</b> | Yes <input type="checkbox"/>                                                     |  |
|                                  | No <input type="checkbox"/>                                                      |  |
| <b>Alvarado score</b>            | Abdominal pain that migrates to the right iliac fossa <input type="checkbox"/>   |  |
|                                  | Anorexia (loss of appetite) or ketones in the urine <input type="checkbox"/>     |  |
|                                  | Nausea or vomiting <input type="checkbox"/>                                      |  |
|                                  | Tenderness (Pain on pressure) in right iliac fossa <input type="checkbox"/>      |  |
|                                  | Rebound tenderness <input type="checkbox"/>                                      |  |
|                                  | Raised temperature ( $\geq 37.3^{\circ}\text{C}$ ) <input type="checkbox"/>      |  |
|                                  | Leukocytosis ( $>10 \text{ WCC} \times 10^9/\text{L}$ ) <input type="checkbox"/> |  |
|                                  | Neutrophils $>75\%$ (left shift) <input type="checkbox"/>                        |  |
|                                  | Time from symptoms to ER consultation _____ hours                                |  |
| <b>Consent obtained</b>          | Yes <input type="checkbox"/>                                                     |  |
|                                  | No <input type="checkbox"/>                                                      |  |
| <b>Blood obtained for PSP</b>    | Yes <input type="checkbox"/>                                                     |  |
|                                  | No <input type="checkbox"/>                                                      |  |
|                                  | Date and time: __/__/____, __:__ (dd/mm/yyyy, hh:mm)                             |  |
| <b>Re-Attendance to ER</b>       | Yes <input type="checkbox"/>                                                     |  |
|                                  | No <input type="checkbox"/>                                                      |  |
| <b>Patient status</b>            | Admitted for appendectomy/observation/referred <input type="checkbox"/>          |  |
|                                  | Discharged home directly from the Emergency Room <input type="checkbox"/>        |  |
